# Supplementary material for: A flexible porous metal–azolate framework constructed by [Cu3(μ3-OH)(μ2-O)(triazolate)2]+ building blocks: synthesis, reversible structural transformation and related magnetic properties
Source: Royal Society of Chemistry journal article supplement (doi:10.1039/c3ce00070b), 2013-01-01

Supporting Information for:

A Flexible Porous Metal-azolate Framework Constructed by  
[Cu<sub>3</sub>(μ<sub>3</sub>-OH)(μ<sub>2</sub>-O)(triazolate)<sub>2</sub>]<sup>+</sup> Building Blocks: Synthesis,  
Reversible Structural Transformation and Related Magnetic  
Properties

Bing Xia, Zhenxia Chen, Qingshu Zheng, Hua Zheng, Mingli Deng, Yun Ling,\*  
Linhong Weng, Yaming Zhou\*

Shanghai Key Laboratory of Molecular Catalysis and Innovative Materials,  
Department of Chemistry,  
Fudan University, Shanghai 200433, China

To whom corresponding: Dr. Y. Ling, Email: [yunling@fudan.edu.cn](mailto:yunling@fudan.edu.cn);

Dr. Prof. Y.M. Zhou, Email: [ymzhou@fudan.edu.cn](mailto:ymzhou@fudan.edu.cn)

Table S1. Selected bond length (Å) and angles (°) of **1** and **2**.

| <b>1</b>                                     |           |                                              |           |
|----------------------------------------------|-----------|----------------------------------------------|-----------|
| Cu(1)–O(1)                                   | 1.970(9)  | Cu(1)–O(3)                                   | 1.961(11) |
| Cu(1)–O(5)                                   | 2.283(8)  | Cu(1)–N(1)                                   | 1.998(8)  |
| Cu(2)–O(1)                                   | 1.999(6)  | Cu(2)–O(2)                                   | 1.948(8)  |
| Cu(2)–O(7)                                   | 2.595(11) | Cu(2)–N(2)                                   | 1.948(8)  |
| Cu(2)–O(6) <sup>#1</sup>                     | 2.495(17) | Cu(2)–N(3) <sup>#3</sup>                     | 1.980(12) |
| O(1)–Cu(1)–O(3)                              | 163.2(3)  | O(1)–Cu(1)–O(5)                              | 99.1(3)   |
| O(1)–Cu(1)–N(1)                              | 86.8(3)   | O(3)–Cu(1)–O(5)                              | 97.8(4)   |
| O(3)–Cu(1)–N(1)                              | 92.9(3)   | O(5)–Cu(1)–N(1)                              | 91.1(3)   |
| N(1)–Cu(1)–N(1) <sup>#2</sup>                | 173.4(3)  | O(1)–Cu(2)–O(2)                              | 81.6(3)   |
| O(1)–Cu(2)–O(7)                              | 74.5(3)   | O(1)–Cu(2)–N(2)                              | 86.5(3)   |
| O(1)–Cu(2)–O(6) <sup>#1</sup>                | 90.0(5)   | O(1)–Cu(2)–N(3) <sup>#3</sup>                | 169.4(4)  |
| O(2)–Cu(2)–O(7)                              | 80.9(4)   | O(2)–Cu(2)–N(2)                              | 168.1(3)  |
| O(2)–Cu(2)–O(6) <sup>#1</sup>                | 92.5(4)   | O(2)–Cu(2)–N(3) <sup>#3</sup>                | 95.8(4)   |
| O(7)–Cu(2)–N(2)                              | 96.4(4)   | O(6) <sup>#1</sup> –Cu(2)–O(7)               | 163.9(5)  |
| O(7)–Cu(2)–N(3) <sup>#3</sup>                | 94.9(4)   | O(6) <sup>#1</sup> –Cu(2)–N(2)               | 87.0(4)   |
| N(2)–Cu(2)–N(3) <sup>#3</sup>                | 96.0(4)   | O(6) <sup>#1</sup> –Cu(2)–N(3) <sup>#3</sup> | 100.4(5)  |
| <b>2</b>                                     |           |                                              |           |
| Cu(1)–O(1)                                   | 1.953(7)  | Cu(1)–O(3)                                   | 1.979(11) |
| Cu(1)–O(5)                                   | 2.266(14) | Cu(1)–N(1)                                   | 1.984(7)  |
| Cu(2)–O(1)                                   | 1.974(7)  | Cu(2)–O(2)                                   | 1.924(6)  |
| Cu(2)–O(6)                                   | 2.438(13) | Cu(2)–N(2)                                   | 1.975(6)  |
| Cu(2)–O(7) <sup>#1</sup>                     | 2.602(12) | Cu(2)–N(3) <sup>#2</sup>                     | 1.974(10) |
| O(1)–Cu(1)–O(3)                              | 162.1(4)  | O(1)–Cu(1)–O(5)                              | 99.9(4)   |
| O(1)–Cu(1)–N(1)                              | 87.0(2)   | O(3)–Cu(1)–O(5)                              | 98.0(5)   |
| O(3)–Cu(1)–N(1)                              | 92.9(3)   | O(3)–Cu(1)–N(1) <sup>#3</sup>                | 93.0(3)   |
| O(5)–Cu(1)–N(1)                              | 90.3(3)   | N(1)–Cu(1)–N(1) <sup>#3</sup>                | 174.0(3)  |
| O(1)–Cu(2)–O(2)                              | 80.6(3)   | O(1)–Cu(2)–O(6)                              | 89.1(4)   |
| O(1)–Cu(2)–N(2)                              | 86.9(3)   | O(1)–Cu(2)–O(7) <sup>#1</sup>                | 72.2(4)   |
| O(1)–Cu(2)–N(3) <sup>#2</sup>                | 168.5(3)  | O(2)–Cu(2)–O(6)                              | 98.0(4)   |
| O(2)–Cu(2)–N(2)                              | 166.8(3)  | O(2)–Cu(2)–O(7) <sup>#1</sup>                | 77.9(4)   |
| O(2)–Cu(2)–N(3) <sup>#2</sup>                | 94.7(3)   | O(6)–Cu(2)–N(2)                              | 86.1(3)   |
| O(6)–Cu(2)–O(7) <sup>#1</sup>                | 161.2(5)  | O(6)–Cu(2)–N(3) <sup>#2</sup>                | 102.0(4)  |
| O(7) <sup>#1</sup> –Cu(2)–N(2)               | 94.2(4)   | N(2)–Cu(2)–N(3) <sup>#2</sup>                | 96.8(3)   |
| O(7) <sup>#1</sup> –Cu(2)–N(3) <sup>#2</sup> | 96.6(4)   |                                              |           |

Symmetry codes used for **1**: #1: x,y,1+z; #2: 1-y,1-x,z; #3: 2/3-y,1/3+x-y,1/3+z

Symmetry codes used for **2**: #1: -1+x,y,z; #2: 2/3-x+y,2/3-x,-1/3+z; #3: x,1+x-y,z

**Figure S1.** The IR spectra of **1**, **2**, and the product obtained without DMF. (the clear peak at 1592 and 1638  $\text{cm}^{-1}$  should be ascribed to the vibration of carboxylate group of  $\text{HCOO}^-$  and  $\text{CH}_3\text{COO}^-$  respectively)

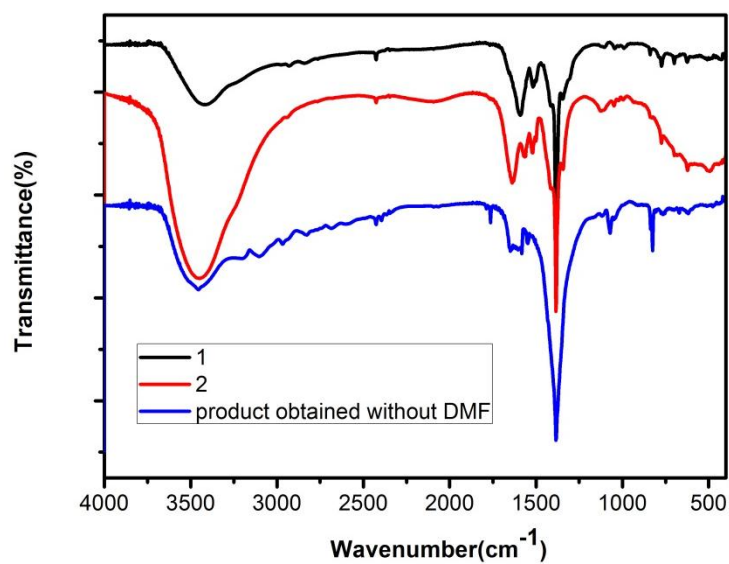

**Figure S2.** The PXRD patterns of as-made **1** and **2** compared with the simulated one

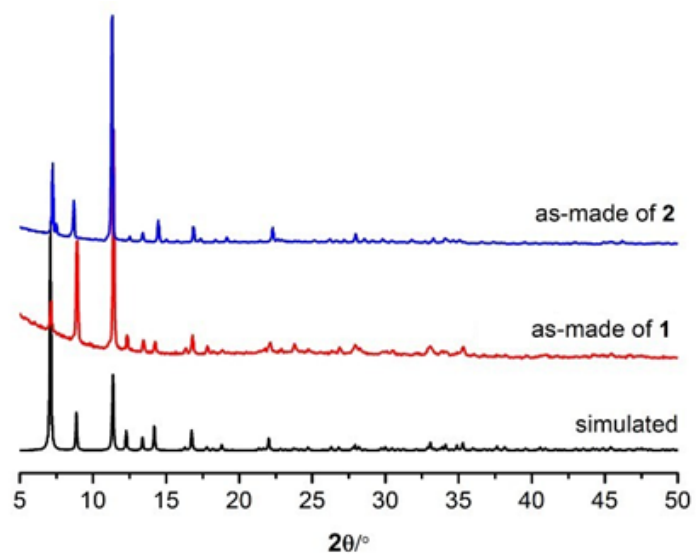

**Figure S3.** The PXRD patterns of the samples obtained using NaOAc or NaHCOO

was used as the source of carboxylates without DMAC or DMF

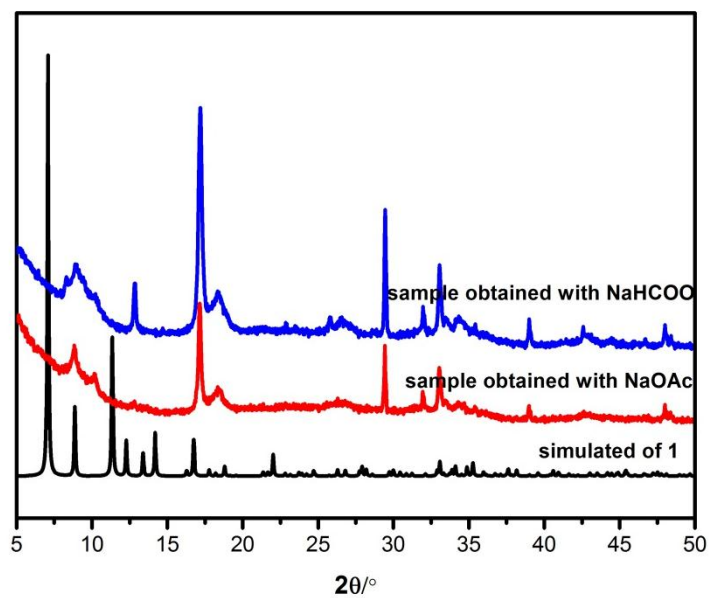

**Figure S4.** (a) the structural motif of **1** with atom number labeled (Symmetry code: A:  $1-y, 1-x, z$ ; B:  $2/3-y, 1/3+x-y, 1/3+z$ ; C:  $x, y, 1+z$ , the hydrogen atoms and lattice water molecule are omitted for clarity)

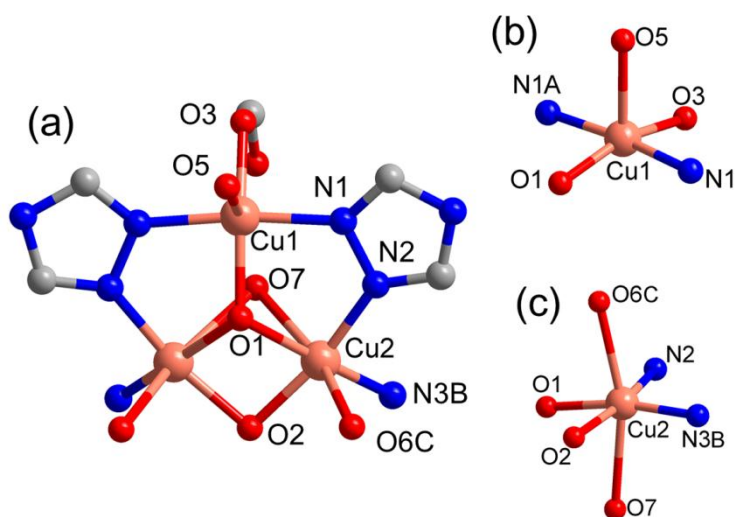

**Figure S5.** TGA data of **1** and **2**

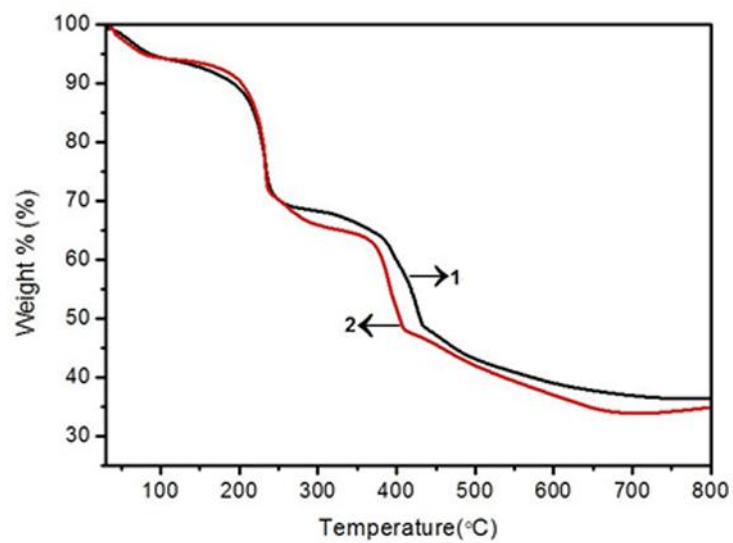

**Figure S6.** (a) The temperature-dependent PXRD patterns from room temperature to 200 °C; (b) the optic images of as-made sample and degased sample

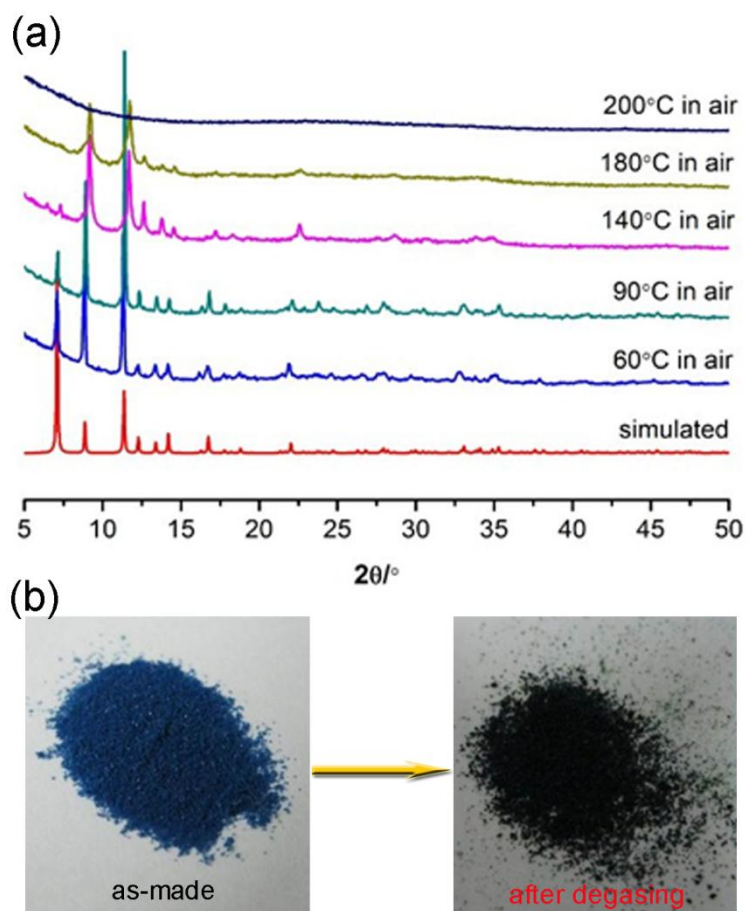



**Figure S7.** (a) the cleaved surface by (2, -1, 0) corresponding to the diffraction peak at  $2\theta = 7.08^\circ$ ; (b) (2, 0, -1) corresponding to the diffraction peak at  $2\theta = 11.67^\circ$ , (c) (1, 0, 1) corresponding to the diffraction peak at  $9.13^\circ$

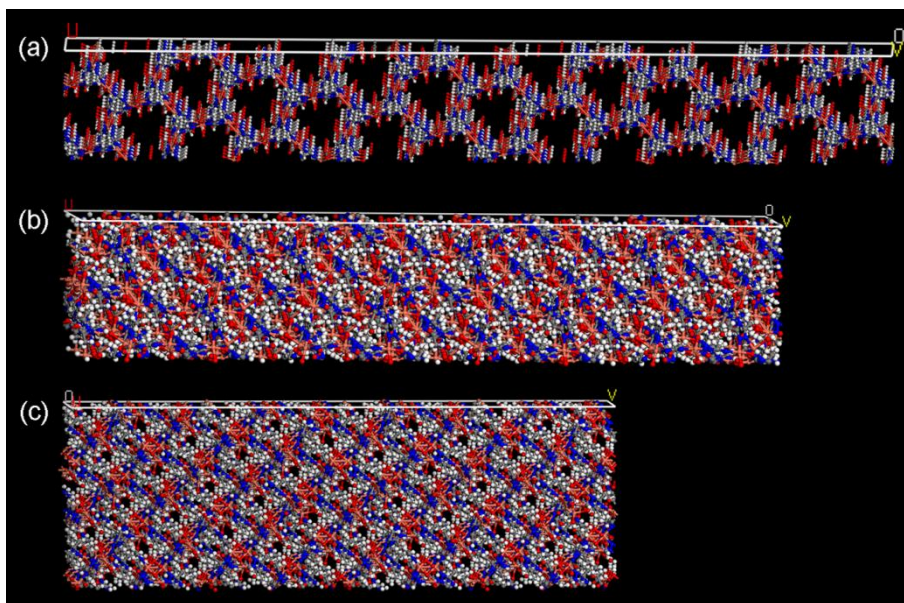

**Figure S8.** (a) the Connolly surface area calculated with probe atomic radii of 1.4 Å;  
(b) the theoretical accessible surface area calculated with the probe atomic radii of 1.84 Å.

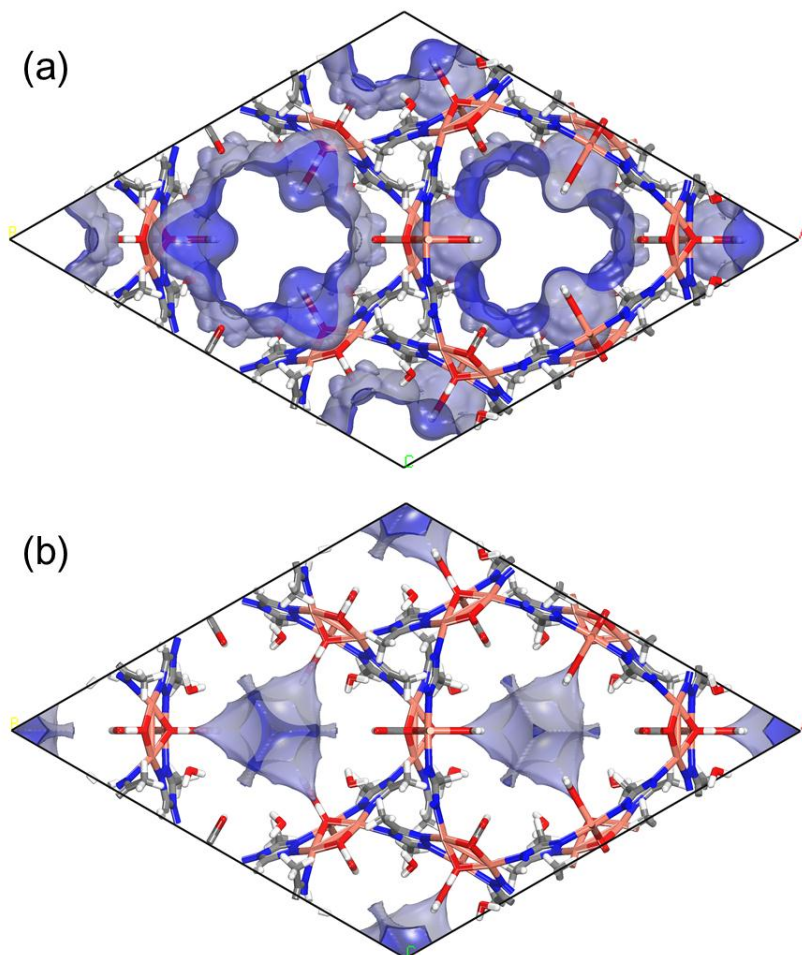

| Connolly Surface (Å <sup>2</sup> )/cell | Accessible Solvent Surface (Å <sup>2</sup> )/cell | Dc (g/cm <sup>3</sup> ) | Volume (Å <sup>3</sup> ) |
|-----------------------------------------|---------------------------------------------------|-------------------------|--------------------------|
| 1452.98                                 | 472.14                                            | 1.314                   | 6059                     |

Theoretical Surface area = A.S.S. / (Dc×Volume) × 10<sup>4</sup> m<sup>2</sup>/g = 593 m<sup>2</sup>/g

MOF-5 was calculated to be 3669.25 Å<sup>2</sup>/cell, so theoretical surface area is 2739 m<sup>2</sup>/g,  
which is similar to the experimental result.

**Figure S9.** (a) the high pressure CO<sub>2</sub> adsorption of **1** at 273 K; (b) the pore size distribution calculated with NLDFIT based on the adsorption data (For CO<sub>2</sub>, the P<sub>0</sub> = 3.4851 MPa at 273 K. The six data points in the range of 0.03 ~ 0.25 were chosen for BET calculation).

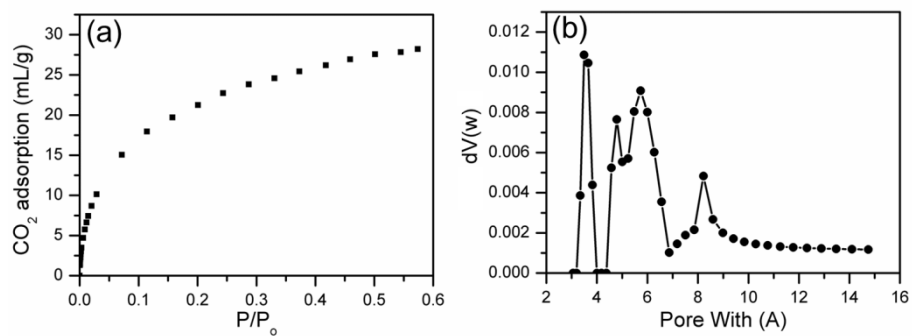

**Figure S10.** The  $\chi_m^{-1}$  vs. T plot for as-made (a) and dehydrated (b) sample fitted by Curie–Weiss method above 120K

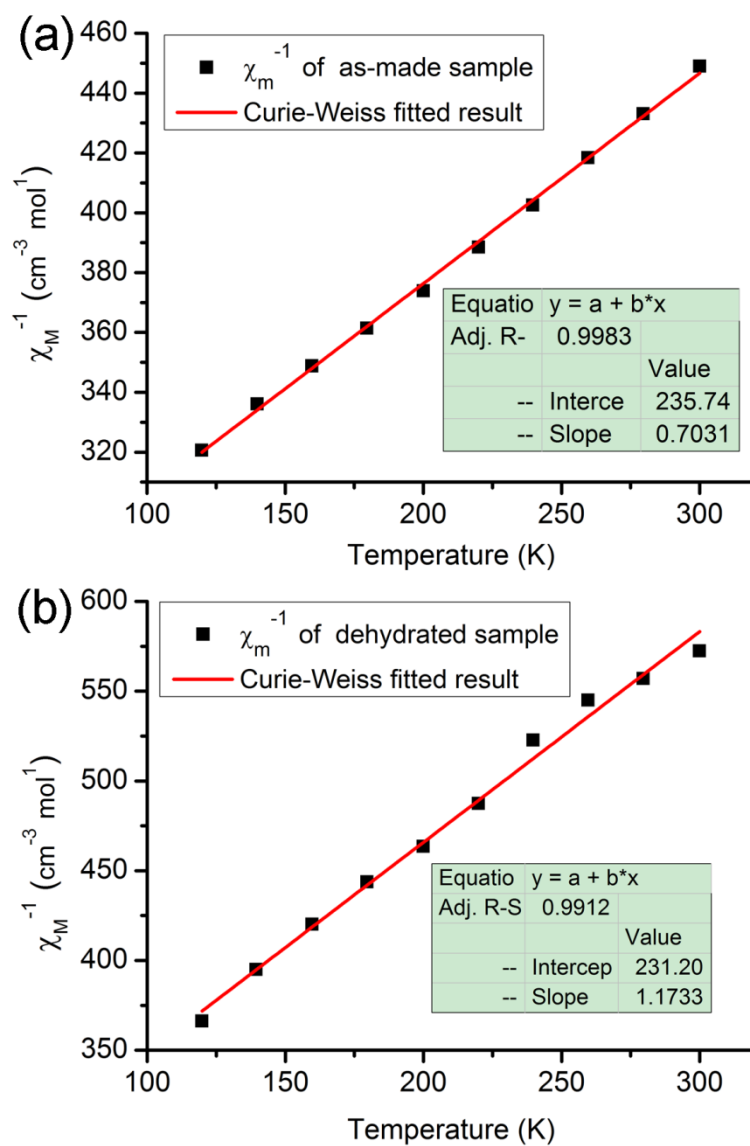

Supplement: c3ce00070b.pdf [file c3ce00070b.pdf]
